# Supplementary material for: In vitro bioactivity evaluation of mulberry leaf extracts as nutraceuticals for the management of diabetes mellitus
Source: Royal Society of Chemistry journal article supplement (doi:10.1039/d2fo00114d), 2022-01-01
Supplement: d2fo00114d1.pdf [file d2fo00114d1.pdf]

## Supplementary material

**Table S1.** Recovery percentage and precision data obtained with spiked samples.

| Intra-day (n = 6)                 |         |              |
|-----------------------------------|---------|--------------|
| DNJ nominal concentration (mg/mL) | RSD (%) | Recovery (%) |
| 0.05                              | 4.16    | 99.33        |
| 0.20                              | 4.08    | 101.00       |
| 0.50                              | 2.85    | 101.33       |
| Inter-day (n = 6)                 |         |              |
| DNJ nominal concentration (mg/mL) | RSD (%) | Recovery (%) |
| 0.05                              | 6.60    | 102.67       |
| 0.20                              | 4.15    | 101.00       |
| 0.50                              | 1.69    | 100.17       |

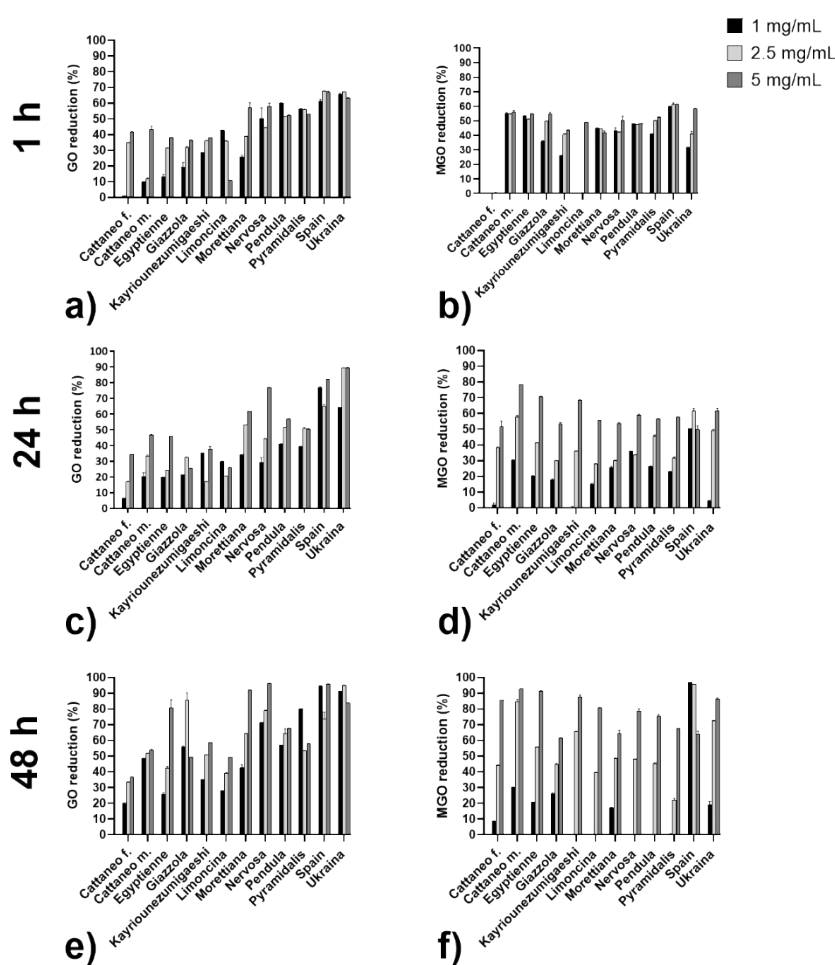

**Figure S1.** Glyoxal and methylglyoxal trapping capacity of *Morus alba* leaf extracts at the doses of 1, 2.5, and 5 mg/mL after incubation (1–48 h).
